# Supplementary material for: A Coordinated Suite of Wild-Introgression Lines in Indica and Japonica Elite Backgrounds
Source: Front Plant Sci. 2020 Nov 12;11:564824. doi: 10.3389/fpls.2020.564824 (PMC7688981; doi:10.3389/fpls.2020.564824)
Supplement: Supplementary file 4 [file Table_1.xlsx]

## Sheet: Table_S1
Table S1. List of traits evaluated in the CSSL donors and recurrent parents under greenhouse conditions
Trait category	Index_No	Trait name	Acronym(1)	Trait description
Plant morphology	1	Culm angle(2)	CUAN	Angle of inclination of the base of the main culm from vertical. Culm angle reading are based on plant grown in greenhouse and recorded after flowering; described as, 1= erect (<300), 3= intermediate (~450), 5=open (~600), 7= spreading (>600), 9=procumbent; avg. 5 plants/acc.
Plant morphology	2	Awn presence(2)	AWPLU, AwType	Presence or absence of awns examined at reproductive stage; length and extent of awns; described as, 0=absent; 1= short and parlty awned; 5=short and fully awned; 7=long and partly awned, 9=long and fully awned; recorded from 5 plants/acc.
Plant morphology	3	Panicle type(2)	PNTYPE, PnT	A panicle morphology trait classified according to their mode of branching, angle of primary branches and spikelet density; recorded at reproductive stage; described as Compact (1), Intermediate (4), Open (7); avg. 5 plants / acc.
Plant morphology	4	Rhizome/stolon formation(2)	RhyzForm, RHIFOR	The presence of horizontal stem in mature plant, i.e. rhizomes (below the surface to allow plant spreading), stolons (above ground that allows plant to reproduce asexually); observed at harvest; described as 1=vegetative crown, 2=vegetative crown and stolen, 3= vegetative crown and weak rhizomes, 4=vegetative crown/stolen and weak rhizomes; 5=Strong rhizomes and no tubers, 6= strong rhizomes with…
Plant morphology	5	Elbows	ELB	Presence of elbows (culm angle at node(s)); described as, 0=absent, 1=Present; avg. 5 plants / acc.
Plant morphology	6	Plant height(3)	PlntHt(1)	Plant height defined as distance from the soil surface to the highest point of the plant, i.e. flag leaf (cm); avg. 5 plants/acc.
Flowering time	7	Days to flowering in Ithaca, NY	DTFL, DTHD(1)	A flowering time trait, which is the number of days required for plants to reach 20% anthesis from the date of seed sowing. Measured at Guterman Greenhouse during summer 2015, Cornell University, Ithaca, NY, USA
Yield-related	8	Seed production	SDPRDN	Described as number of seeds produce/panicle, quantified as low (0-10); moderate (10-20); high (>20)
Grain related	9	Seed shattering or hilum abscission(3)	SDSH	A seed growth and development trait observed as the extent of seed shattering based on the development of an abscission zone, held in hand with mild pressure; observed at harvest; described as, 0= no shattering, 3= Low (~3%), 5= Moderate (~15%), 7= High (~35%), 9=Very High ( > 50%).
Grain related	10	Lemma and Palea: Hull color(4)	HULCL	The color of hull-the dry outer covering of a grass fruit/grain and comprises of dry lemma and palea, the two parts of a grass floret; described as, 1=white, 2=straw, 3=gold, 4=tawny/russet, 5=furrowed, 5=spotted, pibald, 7=purple, 8=black; avg. 5 seeds / acc.
Grain related	11	Caryopsis: Grain color(4)	DHULGRCL, PericCol	Color of unpolished rice grain/seed coat color/bran color/pericarp color; observed as 1=white, 2=light brown, 3=speckled brown, 4=brown, 5=red, 6=variable purple, 7=purple; avg. 5 seeds/acc.
Grain related	12	Hull length or grain length(3)	HULGRLG	Length of whole grain including the hull, defined as the distance from the base of the lowermost glume to the tip (apiculus) of the fertile lemma or palea; on awned cultivars, measure to a point comparable to the tip of the apiculus (exclude the awn); measure with calliper; avg. 5 seeds/acc.
Grain related	13	Hull width or grain width(3)	HULGRWD, GrWdt, GRWD	Width of whole grain including the hull, defined as the distance across the fertile lemma and the palea at the widest point; measure with calliper; avg. 5 seeds/acc.
Grain related	14	Grain length or caryopsis length(3)	DHULGRLG, CaryoLng	The length of the caryopsis, ie the seed with seed coat fused to pericarp, which is the structure that remains after dehulling (decorticating) the grain and before milling; measure with calliper; avg. 5 seeds/acc.
Grain related	15	Grain width or caryopsis width(3)	DHULGRWD, CaryoWdt	The width of the caryopsis at its widest point at right angles to its length (i.e. the seed with seed coat fused to pericarp, which is the structure that remains after dehulling the grain and before milling); measure with calliper; avg. 5 seeds/acc
Grain related	16	Phenol reaction (5)	PH, Po	Grains and hulls stain dark violet with phenol solution; usually indica varieties show that reaction. Black hull color is due to the complementary genes, Ph, Bh1 and Bh2. Phenol reaction of seed hull following 7 days treatment with 2% aqueous phenol solution; oberved in a hull and an un-hulled seeds and scored as 0= negative and 1=positive.
(1) The trait ontology according to the Planteome (http://browser.planteome.org/amigo )
(2) Morpho-agronomic descriptors from IRRI (http://irgcis.irri.org:81/grc/Morpho_agron.html)
(3) Crop Genebank list of descriptors for rice (http://cropgenebank.sgrp.cgiar.org/images/file/management/rice.pdf)
(4) Based on USDA-ARS Germplasm Resource Information Network (GRIN)- (https://npgsweb.ars-grin.gov/gringlobal/descriptors.aspx)
(5) As described by Chen et al. 2014

## Sheet: Table_ S2
Table S2. Characteristics of lines comprising the six CSSL libraries
GSOR ID	Library	Line name	No. introgressed segments	Percent heterozygous markers	Percent donor markers	Percent missing markers	Pericarp color (donor introg*)	Shattering (donor introg)	Hull color (donor introg)	Flowering Time (donor introg)	Pericarp color (observed)	Pigmented hull (observed)	Shattering (observed)	Late flowering (observed)	Observations about low seed set ***	Collection site of REF ****	pi-ta (donor SNP) *****	GS3 (donor SNP)	ALK (donor SNP)	Waxy (donor SNP)	Additional Comments
GSOR701203	Cyb x OrA	CYB_OrA_1	3	0.00189036	0.0250473	0.00708885										field
GSOR701601	Cyb x OrA	CYB_OrA_2	3	0.00519849	0.020794	0										field
GSOR701602	Cyb x OrA	CYB_OrA_3	9	0.00661626	0.0510397	0										field
GSOR701208	Cyb x OrA	CYB_OrA_4	20	0.0250473	0.161626	0.0122873	Rc, Rd		Bh4-~het, Ph-~het		brown					GH
GSOR701603	Cyb x OrA	CYB_OrA_5	3	0.00141777	0.0396975	0				RFT1(H-BB**); Hd3a(H-BB)						field
GSOR701604	Cyb x OrA	CYB_OrA_6	4	0.00330813	0.0482042	0	Rd									field
GSOR701211	Cyb x OrA	CYB_OrA_7	7	0.0127599	0.0671078	0.00141777		qSH1								field
GSOR701605	Cyb x OrA	CYB_OrA_8	3	0.0141777	0.0363894	0.00047259		qSH1								field
GSOR701606	Cyb x OrA	CYB_OrA_9	27	0.0486767	0.0855388	0.108696			Bh4-~het, Ph-het	Ehd1~						field
GSOR701607	Cyb x OrA	CYB_OrA_10	10	0.00330813	0.0396975	0.0094518										field
GSOR701214	Cyb x OrA	CYB_OrA_11	21	0.0132325	0.270794	0.00189036	Rc			Ghd7	red					GH
GSOR701216	Cyb x OrA	CYB_OrA_12	4	0.00094518	0.0250473	0.00047259										field
GSOR701217	Cyb x OrA	CYB_OrA_13	14	0.0193762	0.13327	0.0122873			Bh4-~het, Ph-~het							field
GSOR701608	Cyb x OrA	CYB_OrA_14	2	0	0.0255198	0.00094518										field
GSOR701219	Cyb x OrA	CYB_OrA_15	7	0.00094518	0.0727788	0										field
GSOR701220	Cyb x OrA	CYB_OrA_16	4	0.00567108	0.0586011	0								late		field
GSOR701609	Cyb x OrA	CYB_OrA_17	10	0.0250473	0.101607	0.00094518	Rc			Ghd7-het	red					GH
GSOR701222	Cyb x OrA	CYB_OrA_18	2	0	0.0170132	0										field
GSOR701223	Cyb x OrA	CYB_OrA_19	5	0	0.0316635	0										field
GSOR701610	Cyb x OrA	CYB_OrA_20	3	0.00378072	0.0604915	0.00047259		OsSh1~								field		GS3
GSOR701611	Cyb x OrA	CYB_OrA_21	4	0	0.0382798	0		OsSh1								field
GSOR701612	Cyb x OrA	CYB_OrA_22	7	0.00047259	0.0609641	0										field
GSOR701613	Cyb x OrA	CYB_OrA_23	3	0.00425331	0.0784499	0.00047259										field			(ALK~)
GSOR701229	Cyb x OrA	CYB_OrA_24	25	0.0430057	0.0987713	0.020794			Bh4-het, Ph-het							field
GSOR701231	Cyb x OrA	CYB_OrA_25	8	0.0236295	0.0756144	0										field
GSOR701232	Cyb x OrA	CYB_OrA_26	2	0.00141777	0.0179584	0										field
GSOR701614	Cyb x OrA	CYB_OrA_27	4	0.00283554	0.0604915	0.00047259		OsSh1~								field		GS3
GSOR701234	Cyb x OrA	CYB_OrA_28	5	0	0.0113422	0										field
GSOR701235	Cyb x OrA	CYB_OrA_29	6	0.00330813	0.0241021	0								late		field
GSOR701236	Cyb x OrA	CYB_OrA_30	7	0.0245747	0.081758	0.00047259										field
GSOR701237	Cyb x OrA	CYB_OrA_31	2	0.00661626	0.063327	0.00047259										field
GSOR701239	Cyb x OrA	CYB_OrA_32	5	0.0113422	0.036862	0.00189036										field
GSOR701240	Cyb x OrA	CYB_OrA_33	3	0	0.0179584	0								late		field				Waxy
GSOR701615	Cyb x OrA	CYB_OrA_34	9	0.018431	0.0732514	0.00047259				RFT1; Hd3a						field				Waxy
GSOR701616	Cyb x OrA	CYB_OrA_35	9	0.0165406	0.0534026	0.00094518				RFT1; Hd3a						field			(ALK)
GSOR701617	Cyb x OrA	CYB_OrA_36	5	0.0217391	0.0827032	0.00141777										field			(ALK~)
GSOR701245	Cyb x OrA	CYB_OrA_37	4	0.0293006	0.0387524	0.00047259										field
GSOR701247	Cyb x OrA	CYB_OrA_38	9	0.00047259	0.0812854	0										field
GSOR701618	Cyb x OrA	CYB_OrA_39	1	0.00047259	0.0118147	0										field
GSOR701250	Cyb x OrA	CYB_OrA_40	4	0	0.0666352	0	Rc				red					GH
GSOR701619	Cyb x OrA	CYB_OrA_41	5	0.0174858	0.0510397	0.00330813	Rc			Ghd7	red			late	~100 seeds	GH
GSOR701257	Cyb x OrA	CYB_OrA_42	5	0.00283554	0.109168	0.00189036	Rc			Ghd7	red					GH
GSOR701265	Cyb x OrA	CYB_OrA_43	14	0.0174858	0.13327	0.00094518	Rc			Ghd7(BB-H)	red					GH
GSOR701276	Cyb x OrA	CYB_OrA_44	2	0.00141777	0.0269376	0										field
GSOR701246	Cyb x OrA	CYB_OrA_45	4	0.00425331	0.039225	0.00047259									<25 seeds	field
GSOR701620	Cyb x OrA	CYB_OrA_46	2	0.0108696	0.0226843	0.00378072									<150 seeds	GH
GSOR701621	Cyb x OrA	CYB_OrA_47	3	0.0118147	0.044896	0.00330813									<150 seeds	GH
GSOR701622	Cyb x OrA	CYB_OrA_48	1	0.00047259	0.0122873	0										field
GSOR701623	Cyb x OrA	CYB_OrA_49	4	0.00567108	0.0335539	0										field
GSOR701624	Cyb x OrA	CYB_OrA_50	3	0	0.0108696	0										field
GSOR701625	Cyb x OrA	CYB_OrA_51	10	0.00567108	0.119093	0										field
GSOR701269	Cyb x OrA	CYB_OrA_52	6	0.00661626	0.0307183	0										field
GSOR701271	Cyb x OrA	CYB_OrA_53	6	0.00141777	0.084121	0										field
GSOR701272	Cyb x OrA	CYB_OrA_54	8	0.0146503	0.113422	0.00094518				RFT1~; Hd3a~						field	Pi-ta-het		(ALK)
GSOR701273	Cyb x OrA	CYB_OrA_55	25	0.0354442	0.254253	0.00330813	Rc			Ghd7	red					field
GSOR701274	Cyb x OrA	CYB_OrA_56	6	0.00189036	0.0387524	0				RFT1(H-BB); Hd3a(H-BB)						field			(ALK)
GSOR701275	Cyb x OrA	CYB_OrA_57	9	0.0482042	0.188091	0.00141777										field
GSOR701277	Cyb x OrA	CYB_OrA_58	2	0.00425331	0.0193762	0										field
GSOR701626	Cyb x OrA	CYB_OrA_59	7	0.0047259	0.0902647	0		OsSh1								field
GSOR701278	Cyb x OrA	CYB_OrA_60	12	0.0132325	0.118147	0.00236295										field
GSOR701279	Cyb x OrA	CYB_OrA_61	7	0.00283554	0.0987713	0				Ghd7						field
GSOR701627	Cyb x OrA	CYB_OrA_62	8	0.010397	0.0694707	0.00047259				Ghd7						field
GSOR701281	Cyb x OrA	CYB_OrA_63	6	0.00094518	0.0614367	0				Ghd7						field
GSOR701103	Cyb x OrB	CYB_OrB_1	3	0.000742666	0.0382473	0										field
GSOR701104	Cyb x OrB	CYB_OrB_2	2	0	0.020052	0										field
GSOR701105	Cyb x OrB	CYB_OrB_3	2	0.000371333	0.015596	0										field
GSOR701630	Cyb x OrB	CYB_OrB_4	6	0.021166	0.0605273	0.003342	Rd								<50 seeds	GH
GSOR701631	Cyb x OrB	CYB_OrB_5	2	0.00965466	0.0241367	0										field
GSOR701632	Cyb x OrB	CYB_OrB_6	1	0	0.01671	0.000371333										field
GSOR701109	Cyb x OrB	CYB_OrB_7	2	0	0.0118827	0.000371333										field
GSOR701633	Cyb x OrB	CYB_OrB_8	4	0.00705533	0.0285926	0.000371333		qSH1								field
GSOR701634	Cyb x OrB	CYB_OrB_9	3	0.000371333	0.0148533	0.004456										field
GSOR701112	Cyb x OrB	CYB_OrB_10	2	0.000371333	0.021166	0										field
GSOR701635	Cyb x OrB	CYB_OrB_11	1	0	0.0129967	0										field
GSOR701636	Cyb x OrB	CYB_OrB_12	7	0.006684	0.067954	0.000371333										field
GSOR701115	Cyb x OrB	CYB_OrB_13	1	0	0.0464166	0.000371333										field
GSOR701116	Cyb x OrB	CYB_OrB_14	4	0.0103973	0.0382473	0										field
GSOR701117	Cyb x OrB	CYB_OrB_15	1	0	0.00928333	0										field
GSOR701118	Cyb x OrB	CYB_OrB_16	3	0.000371333	0.0441886	0										field
GSOR701119	Cyb x OrB	CYB_OrB_17	5	0	0.0282213	0										field				Waxy
GSOR701120	Cyb x OrB	CYB_OrB_18	4	0.015596	0.065726	0.000742666										field
GSOR701121	Cyb x OrB	CYB_OrB_19	1	0.000371333	0.0349053	0		OsSh1								field		GS3
GSOR701637	Cyb x OrB	CYB_OrB_20	2	0.00371333	0.0375046	0.000371333		OsSh1~								field
GSOR701123	Cyb x OrB	CYB_OrB_21	2	0.000371333	0.0375046	0										field
GSOR701124	Cyb x OrB	CYB_OrB_22	2	0	0.01671	0										field
GSOR701125	Cyb x OrB	CYB_OrB_23	1	0.000742666	0.00854066	0										field
GSOR701126	Cyb x OrB	CYB_OrB_24	2	0.000742666	0.013368	0.000742666										field
GSOR701638	Cyb x OrB	CYB_OrB_25	9	0.0285926	0.0549573	0.0207947										GH
GSOR701639	Cyb x OrB	CYB_OrB_26	2	0	0.0137393	0.004456									50-100 seeds	GH					Many of the parent seeds planted had shiveled endosperms and failed to germinate
GSOR701129	Cyb x OrB	CYB_OrB_27	4	0	0.046788	0			Bh4							field
GSOR701640	Cyb x OrB	CYB_OrB_28	2	0	0.025622	0			Bh4							field
GSOR701641	Cyb x OrB	CYB_OrB_29	2	0.00965466	0.0241367	0			Ph							field
GSOR701642	Cyb x OrB	CYB_OrB_30	2	0	0.015596	0		SH4	Ph~				shatters			GH
GSOR701643	Cyb x OrB	CYB_OrB_31	3	0	0.0118827	0										field
GSOR701644	Cyb x OrB	CYB_OrB_32	7	0.00928333	0.0263646	0.0103973										field
GSOR701172	Cyb x OrB	CYB_OrB_33	7	0.000742666	0.0638693	0										field
GSOR701137	Cyb x OrB	CYB_OrB_34	5	0.00148533	0.031192	0.000371333										field
GSOR701138	Cyb x OrB	CYB_OrB_35	5	0.00408466	0.031192	0										field
GSOR701139	Cyb x OrB	CYB_OrB_36	2	0	0.032306	0										field
GSOR701140	Cyb x OrB	CYB_OrB_37	2	0	0.0241367	0										field
GSOR701141	Cyb x OrB	CYB_OrB_38	3	0.000371333	0.047902	0										field
GSOR701645	Cyb x OrB	CYB_OrB_39	13	0.0341626	0.049016	0.0204233				RFT1; Hd3a				late	50-100 seeds	GH				Waxy
GSOR701646	Cyb x OrB	CYB_OrB_40	3	0.000371333	0.0430746	0.000742666				Hd1				late	50-100 seeds	GH			ALK
GSOR701144	Cyb x OrB	CYB_OrB_41	4	0.001114	0.0371333	0										field
GSOR701145	Cyb x OrB	CYB_OrB_42	8	0.00371333	0.0906053	0.000371333										field
GSOR701647	Cyb x OrB	CYB_OrB_43	4	0.002228	0.0683253	0	Rc			Ghd7	red					GH
GSOR701648	Cyb x OrB	CYB_OrB_44	7	0.0226513	0.0505013	0.00408466				Ghd7					100-200 seeds	GH
GSOR701649	Cyb x OrB	CYB_OrB_45	7	0.000371333	0.0196807	0.000371333										field
GSOR701650	Cyb x OrB	CYB_OrB_46	9	0.00854066	0.0371333	0.000371333										field
GSOR701152	Cyb x OrB	CYB_OrB_47	3	0	0.0352766	0			Bh4							field
GSOR701651	Cyb x OrB	CYB_OrB_48	1	0	0.0148533	0										field
GSOR701652	Cyb x OrB	CYB_OrB_49	1	0	0.00519866	0										field
GSOR701155	Cyb x OrB	CYB_OrB_50	1	0.00148533	0.0427033	0										field
GSOR701156	Cyb x OrB	CYB_OrB_51	2	0.000371333	0.023394	0										field
GSOR701157	Cyb x OrB	CYB_OrB_52	2	0	0.014482	0										field
GSOR701158	Cyb x OrB	CYB_OrB_53	7	0.000742666	0.0642406	0.000742666	Rd~									field
GSOR701159	Cyb x OrB	CYB_OrB_54	2	0.001114	0.0360193	0.000742666										field
GSOR701160	Cyb x OrB	CYB_OrB_55	8	0	0.018938	0										field
GSOR701161	Cyb x OrB	CYB_OrB_56	5	0	0.0408466	0	Rd~									field		GS3
GSOR701653	Cyb x OrB	CYB_OrB_57	8	0.0137393	0.0204233	0										field
GSOR701163	Cyb x OrB	CYB_OrB_58	2	0	0.0181953	0										field
GSOR701164	Cyb x OrB	CYB_OrB_59	3	0.0103973	0.0237653	0.015596										field
GSOR701165	Cyb x OrB	CYB_OrB_60	6	0	0.0508726	0.000371333										field
GSOR701166	Cyb x OrB	CYB_OrB_61	2	0.000742666	0.0230227	0										field
GSOR701654	Cyb x OrB	CYB_OrB_62	1	0.000371333	0.0274786	0				Ehd1						field
GSOR701655	Cyb x OrB	CYB_OrB_63	2	0	0.00779799	0										field
GSOR701169	Cyb x OrB	CYB_OrB_64	2	0.001114	0.01671	0.000371333										field
GSOR701656	Cyb x OrB	CYB_OrB_65	2	0.00185667	0.0282213	0										field
GSOR701657	Cyb x OrB	CYB_OrB_66	1	0.000371333	0.032306	0										field
GSOR701658	Cyb x OrB	CYB_OrB_67	5	0.000371333	0.0419606	0										field
GSOR701659	Cyb x OrB	CYB_OrB_68	9	0.034534	0.0865206	0.00371333				Ghd7					100-150 seeds	GH
GSOR701176	Cyb x OrB	CYB_OrB_69	1	0	0.00594133	0										field
GSOR701177	Cyb x OrB	CYB_OrB_70	8	0.000371333	0.0363906	0										field	pi-ta
GSOR701178	Cyb x OrB	CYB_OrB_71	3	0.0226513	0.0586706	0.000371333										field	pi-ta
GSOR701179	Cyb x OrB	CYB_OrB_72	2	0.00148533	0.0397326	0.000371333										field	pi-ta			Waxy
GSOR701180	Cyb x OrB	CYB_OrB_73	5	0.00408466	0.035648	0										field
GSOR701181	Cyb x OrB	CYB_OrB_74	2	0	0.017824	0.000371333										field
GSOR701182	Cyb x OrB	CYB_OrB_75	4	0.00408466	0.049016	0	Rc			Ghd7	red					GH
GSOR701183	Cyb x OrB	CYB_OrB_76	13	0.0453026	0.052358	0.0285926										field
GSOR701660	Cyb x OrC	CYB_OrC_1	3	0.00952003	0.0321301	0.00317334										GH
GSOR701661	Cyb x OrC	CYB_OrC_2	2	0	0.0448235	0										GH
GSOR701662	Cyb x OrC	CYB_OrC_3	3	0.0087267	0.0428401	0.00277668										GH
GSOR701663	Cyb x OrC	CYB_OrC_4	1	0.000793336	0.0595002	0		qSH1								GH
GSOR701664	Cyb x OrC	CYB_OrC_5	3	0.0087267	0.0329234	0.00277668		qSH1								GH
GSOR701665	Cyb x OrC	CYB_OrC_6	2	0	0.0218167	0				RFT1; Hd3a					0 seeds from ref individual; 50 seeds from bulked row	field				Waxy
GSOR701012	Cyb x OrC	CYB_OrC_7	3	0.00277668	0.0166601	0.000793336										field
GSOR701013	Cyb x OrC	CYB_OrC_8	1	0	0.0265768	0										field
GSOR701666	Cyb x OrC	CYB_OrC_9	1	0	0.0289568	0										field
GSOR701667	Cyb x OrC	CYB_OrC_10	1	0	0.0206267	0										field
GSOR701016	Cyb x OrC	CYB_OrC_11	1	0	0.0119	0										field
GSOR701668	Cyb x OrC	CYB_OrC_12	1	0	0.0119	0										field
GSOR701669	Cyb x OrC	CYB_OrC_13	1	0	0.0111067	0.000396668										field
GSOR701019	Cyb x OrC	CYB_OrC_14	2	0	0.0158667	0										field
GSOR701670	Cyb x OrC	CYB_OrC_15	1	0	0.0313368	0										field
GSOR701022	Cyb x OrC	CYB_OrC_16	3	0	0.0269734	0										field
GSOR701023	Cyb x OrC	CYB_OrC_17	4	0.00317334	0.0222134	0				RFT1~; Hd3a~						field				Waxy
GSOR701025	Cyb x OrC	CYB_OrC_18	1	0.000396668	0.0360968	0										field		GS3
GSOR701026	Cyb x OrC	CYB_OrC_19	2	0.000793336	0.0206267	0										field
GSOR701027	Cyb x OrC	CYB_OrC_20	2	0.000396668	0.0182467	0		OsSh1								field
GSOR701028	Cyb x OrC	CYB_OrC_21	1	0.000396668	0.0158667	0										field
GSOR701091	Cyb x OrC	CYB_OrC_22	4	0.00634669	0.0281634	0										field
GSOR701030	Cyb x OrC	CYB_OrC_23	1	0.00158667	0.0174534	0										field
GSOR701031	Cyb x OrC	CYB_OrC_24	1	0.00396668	0.0519635	0										field
GSOR701032	Cyb x OrC	CYB_OrC_25	3	0.000396668	0.0115034	0										field
GSOR701033	Cyb x OrC	CYB_OrC_26	1	0	0.0186434	0			Bh4							field
GSOR701671	Cyb x OrC	CYB_OrC_27	1	0	0.0214201	0			Ph							field
GSOR701672	Cyb x OrC	CYB_OrC_28	5	0.000793336	0.0321301	0.000396668		SH4					shatters			GH
GSOR701037	Cyb x OrC	CYB_OrC_29	2	0	0.0206267	0										field
GSOR701673	Cyb x OrC	CYB_OrC_30	1	0	0.0234034	0.000396668										field
GSOR701039	Cyb x OrC	CYB_OrC_31	4	0	0.0368901	0										field
GSOR701674	Cyb x OrC	CYB_OrC_32	2	0	0.0198334	0										field
GSOR701675	Cyb x OrC	CYB_OrC_33	1	0	0.0138834	0										field
GSOR701042	Cyb x OrC	CYB_OrC_34	4	0.00674336	0.0309401	0										field
GSOR701043	Cyb x OrC	CYB_OrC_35	4	0.0087267	0.0146767	0.000793336										field				Waxy
GSOR701676	Cyb x OrC	CYB_OrC_36	3	0.000396668	0.0436335	0.00119				RFT1~; Hd3a; Hd1				late		GH			ALK
GSOR701677	Cyb x OrC	CYB_OrC_37	1	0.000396668	0.0507735	0.000396668				Hd1				late		GH
GSOR701047	Cyb x OrC	CYB_OrC_38	2	0.000396668	0.0357001	0.000396668										field
GSOR701048	Cyb x OrC	CYB_OrC_39	2	0	0.0476002	0										field
GSOR701049	Cyb x OrC	CYB_OrC_40	5	0	0.0146767	0.00277668										field
GSOR701050	Cyb x OrC	CYB_OrC_41	1	0	0.00833003	0										field
GSOR701051	Cyb x OrC	CYB_OrC_42	2	0.000793336	0.0222134	0.000396668	Rc			Ghd7~						field
GSOR701678	Cyb x OrC	CYB_OrC_43	3	0.00198334	0.0388735	0.000396668				Ghd7						field
GSOR701679	Cyb x OrC	CYB_OrC_44	6	0.00952003	0.0710036	0.000793336										GH
GSOR701680	Cyb x OrC	CYB_OrC_45	4	0.00634669	0.0349068	0										field
GSOR701681	Cyb x OrC	CYB_OrC_46	6	0.00277668	0.0539468	0										field
GSOR701056	Cyb x OrC	CYB_OrC_47	2	0	0.00952003	0		SH4~								field
GSOR701682	Cyb x OrC	CYB_OrC_48	2	0	0.0126934	0										field
GSOR701683	Cyb x OrC	CYB_OrC_49	7	0.00238001	0.0686236	0.00198334	Rc~									field
GSOR701059	Cyb x OrC	CYB_OrC_50	2	0.00119	0.0400635	0.00277668										field
GSOR701684	Cyb x OrC	CYB_OrC_51	3	0.00634669	0.0234034	0.00396668										field				Waxy-het
GSOR701685	Cyb x OrC	CYB_OrC_52	2	0	0.0087267	0.000396668										field
GSOR701062	Cyb x OrC	CYB_OrC_53	1	0	0.0158667	0.000396668										field
GSOR701063	Cyb x OrC	CYB_OrC_54	2	0.000396668	0.0206267	0										field
GSOR701064	Cyb x OrC	CYB_OrC_55	7	0.0111067	0.0483935	0.00357001										field
GSOR701065	Cyb x OrC	CYB_OrC_56	1	0	0.0170567	0.00357001										field
GSOR701066	Cyb x OrC	CYB_OrC_57	5	0.00119	0.0670369	0.00158667										field
GSOR701067	Cyb x OrC	CYB_OrC_58	4	0.00952003	0.0277668	0.00158667				RFT1-het; Hd3a-het					0 seeds from ref individual	field				Waxy-het
GSOR701068	Cyb x OrC	CYB_OrC_59	1	0	0.0126934	0									0 seeds from ref individual; 25 seeds from bulked row	field
GSOR701686	Cyb x OrC	CYB_OrC_60	2	0	0.0448235	0										field
GSOR701070	Cyb x OrC	CYB_OrC_61	1	0.000396668	0.0440301	0.000793336				Ehd1~						field
GSOR701071	Cyb x OrC	CYB_OrC_62	3	0.00158667	0.0591035	0.00158667	Rc, Rd			Ghd7; Ehd1					0 seeds from ref individual	field
GSOR701072	Cyb x OrC	CYB_OrC_63	1	0	0.0103134	0.000793336										field
GSOR701073	Cyb x OrC	CYB_OrC_64	1	0	0.00952003	0.000396668										field
GSOR701687	Cyb x OrC	CYB_OrC_65	1	0	0.0182467	0.000396668										field
GSOR701688	Cyb x OrC	CYB_OrC_66	3	0.000396668	0.0396668	0.000793336										field
GSOR701689	Cyb x OrC	CYB_OrC_67	1	0	0.0253868	0.00238001										field
GSOR701690	Cyb x OrC	CYB_OrC_68	4	0	0.0249901	0.00277668										field
GSOR701036	Cyb x OrC	CYB_OrC_69	5	0.000396668	0.0162634	0										field
GSOR701691	Cyb x OrC	CYB_OrC_70	2	0.00158667	0.0134867	0										field
GSOR701692	Cyb x OrC	CYB_OrC_71	3	0.00198334	0.0364935	0		OsSh1								field
GSOR701083	Cyb x OrC	CYB_OrC_72	2	0.00158667	0.0432368	0										field	pi-ta
GSOR701084	Cyb x OrC	CYB_OrC_73	4	0.00277668	0.0313368	0.000396668										field
GSOR701085	Cyb x OrC	CYB_OrC_74	3	0.00119	0.0408568	0										field
GSOR701086	Cyb x OrC	CYB_OrC_75	4	0.000793336	0.01309	0.000396668										field
GSOR701087	Cyb x OrC	CYB_OrC_76	3	0.000396668	0.0238001	0										field
GSOR701693	Cyb x OrC	CYB_OrC_77	3	0	0.0261801	0		SH4~								field
GSOR701503	IR64 x OrA	IR64_OrA_1	5	0.00168805	0.0459149	0.00101283										GH
GSOR701504	IR64 x OrA	IR64_OrA_2	3	0	0.0219446	0										GH
GSOR701505	IR64 x OrA	IR64_OrA_3	5	0	0.0452397	0.00033761				Ehd1						GH
GSOR701700	IR64 x OrA	IR64_OrA_4	5	0.00236327	0.0624578	0.00135044		SH4					shatters			GH
GSOR701507	IR64 x OrA	IR64_OrA_5	4	0.00168805	0.0334234	0.00135044	Rd									GH
GSOR701701	IR64 x OrA	IR64_OrA_6	11	0.0455773	0.141458	0.00135044										GH
GSOR701509	IR64 x OrA	IR64_OrA_7	6	0	0.0766374	0.000675219		qSH1								GH			ALK
GSOR701510	IR64 x OrA	IR64_OrA_8	5	0.00303849	0.027684	0.00033761										GH
GSOR701563	IR64 x OrA	IR64_OrA_9	4	0.000675219	0.0489534	0.00101283										GH
GSOR701514	IR64 x OrA	IR64_OrA_10	2	0.00033761	0.029372	0.00135044				Ehd1~						GH
GSOR701702	IR64 x OrA	IR64_OrA_11	8	0.012154	0.105334	0.00135044									50-75 seeds	GH
GSOR701516	IR64 x OrA	IR64_OrA_12	4	0.00033761	0.0270088	0.00405132										GH
GSOR701517	IR64 x OrA	IR64_OrA_13	1	0	0.0249831	0.00303849										GH
GSOR701518	IR64 x OrA	IR64_OrA_14	3	0.00101283	0.0313977	0.00101283		SH4~	Ph							GH
GSOR701519	IR64 x OrA	IR64_OrA_15	5	0.00371371	0.0837272	0.000675219										GH
GSOR701551	IR64 x OrA	IR64_OrA_16	6	0.00540176	0.0405132	0.00101283										GH
GSOR701703	IR64 x OrA	IR64_OrA_17	8	0.0222822	0.0989196	0.00135044										GH		GS3
GSOR701523	IR64 x OrA	IR64_OrA_18	7	0.0135044	0.0837272	0.000675219									~150 seeds	GH		GS3
GSOR701704	IR64 x OrA	IR64_OrA_19	5	0.00438893	0.134369	0.00033761		OsSh1		Hd1;Ehd1~						GH			ALK
GSOR701526	IR64 x OrA	IR64_OrA_20	4	0	0.0567184	0										GH
GSOR701527	IR64 x OrA	IR64_OrA_21	7	0	0.0526671	0.0033761										GH
GSOR701528	IR64 x OrA	IR64_OrA_22	5	0.00135044	0.0644835	0.00168805	Rc			Ghd7	red					GH
GSOR701529	IR64 x OrA	IR64_OrA_23	8	0.00270088	0.0668467	0.000675219										GH			ALK
GSOR701705	IR64 x OrA	IR64_OrA_24	10	0.0303849	0.0972316	0.00168805		OsSh1								GH
GSOR701511	IR64 x OrA	IR64_OrA_25	4	0	0.0192438	0		SH4~	Ph							GH
GSOR701532	IR64 x OrA	IR64_OrA_26	12	0.0340986	0.120864	0.0033761		SH4	Ph				shatters			GH		GS3-het
GSOR701534	IR64 x OrA	IR64_OrA_27	5	0	0.0486158	0.00168805										GH
GSOR701535	IR64 x OrA	IR64_OrA_28	5	0.00540176	0.0367995	0.000675219										GH
GSOR701537	IR64 x OrA	IR64_OrA_29	3	0	0.0712357	0.000675219		SH4~								GH
GSOR701538	IR64 x OrA	IR64_OrA_30	4	0.00033761	0.0361242	0.000675219										GH
GSOR701542	IR64 x OrA	IR64_OrA_31	5	0.00270088	0.176232	0.00135044				RFT1~; Hd3a~; Hd1						GH			ALK
GSOR701539	IR64 x OrA	IR64_OrA_32	2	0.000675219	0.0283592	0.00270088										GH
GSOR701540	IR64 x OrA	IR64_OrA_33	5	0.000675219	0.0283592	0.00101283				RFT1; Hd3a						GH				Waxy
GSOR701541	IR64 x OrA	IR64_OrA_34	5	0.00236327	0.0486158	0		qSH1								GH			ALK		Plant architecture has some wild characteristics (elbows, leaf sprouting at nodes)
GSOR701706	IR64 x OrA	IR64_OrA_35	10	0.0226199	0.160702	0.00270088		SH4		RFT1-het; Hd3a-het; Hd1			shatters		50-100 seeds	GH			ALK
GSOR701544	IR64 x OrA	IR64_OrA_36	7	0.00540176	0.0300473	0.000675219		SH4					shatters			GH
GSOR701545	IR64 x OrA	IR64_OrA_37	1	0	0.0158677	0.00033761										GH
GSOR701560	IR64 x OrA	IR64_OrA_38	6	0.033761	0.049291	0.00202566			Ph							GH	Pi-ta-het
GSOR701546	IR64 x OrA	IR64_OrA_39	4	0	0.0162053	0.000675219										GH
GSOR701547	IR64 x OrA	IR64_OrA_40	3	0.00573937	0.0253207	0.00202566										GH
GSOR701707	IR64 x OrA	IR64_OrA_41	5	0.00135044	0.0516543	0.00303849	Rc			Ghd7	red					GH
GSOR701550	IR64 x OrA	IR64_OrA_42	9	0.00979068	0.169142	0.00202566				Ghd7						GH
GSOR701552	IR64 x OrA	IR64_OrA_43	5	0.00202566	0.0408508	0.00236327										GH
GSOR701553	IR64 x OrA	IR64_OrA_44	6	0.00945307	0.0793383	0.00168805										GH
GSOR701555	IR64 x OrA	IR64_OrA_45	5	0.0557056	0.0746117	0.00101283										GH
GSOR701579	IR64 x OrA	IR64_OrA_46	12	0.0151924	0.198177	0.00033761										GH	pi-ta	GS3
GSOR701558	IR64 x OrA	IR64_OrA_47	3	0.0168805	0.019919	0.000675219										GH
GSOR701559	IR64 x OrA	IR64_OrA_48	1	0.00033761	0.0178933	0.00270088										GH
GSOR701533	IR64 x OrA	IR64_OrA_49	5	0.00979068	0.043214	0.00168805		SH4~		Ehd1						GH
GSOR701561	IR64 x OrA	IR64_OrA_50	2	0	0.0246455	0.000675219										GH
GSOR701708	IR64 x OrA	IR64_OrA_51	4	0.0033761	0.0435517	0.00168805									~150 seeds	GH
GSOR701709	IR64 x OrA	IR64_OrA_52	4	0.00742741	0.0263336	0				Ehd1~						GH
GSOR701710	IR64 x OrA	IR64_OrA_53	4	0	0.0422012	0				Ehd1						GH
GSOR701566	IR64 x OrA	IR64_OrA_54	3	0.0479406	0.063133	0.00101283		OsSh1-het								GH		GS3-het
GSOR701567	IR64 x OrA	IR64_OrA_55	4	0.00033761	0.0590817	0.00303849										GH
GSOR701569	IR64 x OrA	IR64_OrA_56	5	0.00101283	0.0489534	0.000675219				Ehd1~						GH
GSOR701711	IR64 x OrA	IR64_OrA_57	4	0.000675219	0.122215	0.000675219		OsSh1		Hd1; Ehd1~						GH			ALK
GSOR701712	IR64 x OrA	IR64_OrA_58	7	0.0104659	0.0749494	0.00033761										GH		GS3
GSOR701571	IR64 x OrA	IR64_OrA_59	5	0.00776502	0.0351114	0.00033761										GH
GSOR701713	IR64 x OrA	IR64_OrA_60	4	0.00236327	0.0516543	0.00033761										GH
GSOR701573	IR64 x OrA	IR64_OrA_61	2	0	0.0573937	0		SH4~								GH
GSOR701574	IR64 x OrA	IR64_OrA_62	2	0	0.021607	0										GH
GSOR701715	IR64 x OrA	IR64_OrA_63	1	0.00202566	0.019919	0.000675219										GH
GSOR701576	IR64 x OrA	IR64_OrA_64	3	0.000675219	0.0151924	0.00101283										GH
GSOR701714	IR64 x OrA	IR64_OrA_65	7	0.00101283	0.0462525	0.000675219			Ph							GH
GSOR701531	IR64 x OrA	IR64_OrA_66	9	0.00168805	0.0449021	0.00135044										GH
GSOR701536	IR64 x OrA	IR64_OrA_67	5	0.0192438	0.0810263	0.000675219										GH
GSOR701580	IR64 x OrA	IR64_OrA_68	7	0.00607698	0.133356	0	Rc			Hd1; Ghd7	red					GH
GSOR701403	IR64 x OrB	IR64_OrB_1	4	0.0040107	0.0447861	0										GH
GSOR701404	IR64 x OrB	IR64_OrB_2	3	0	0.0320856	0										GH
GSOR701405	IR64 x OrB	IR64_OrB_3	3	0	0.026738	0		OsSh1								GH
GSOR701406	IR64 x OrB	IR64_OrB_4	1	0	0.0127005	0										GH
GSOR701407	IR64 x OrB	IR64_OrB_5	2	0	0.00802139	0										GH
GSOR701408	IR64 x OrB	IR64_OrB_6	7	0.000668449	0.0641711	0				RFT1; Hd3a						GH
GSOR701493	IR64 x OrB	IR64_OrB_7	3	0.00334225	0.0581551	0										GH	pi-ta
GSOR701410	IR64 x OrB	IR64_OrB_8	2	0	0.0474599	0										GH
GSOR701412	IR64 x OrB	IR64_OrB_9	3	0	0.0187166	0	Rd									GH
GSOR701413	IR64 x OrB	IR64_OrB_10	5	0.0026738	0.0340909	0.0013369	Rd									GH
GSOR701414	IR64 x OrB	IR64_OrB_11	2	0	0.0247326	0										GH
GSOR701415	IR64 x OrB	IR64_OrB_12	2	0	0.0147059	0		qSH1								GH
GSOR701416	IR64 x OrB	IR64_OrB_13	3	0	0.0173797	0										GH
GSOR701720	IR64 x OrB	IR64_OrB_14	2	0.00334225	0.0227273	0										GH
GSOR701418	IR64 x OrB	IR64_OrB_15	4	0	0.0294118	0			Bh4~							GH
GSOR701419	IR64 x OrB	IR64_OrB_16	3	0	0.0287433	0										GH
GSOR701420	IR64 x OrB	IR64_OrB_17	3	0	0.0274064	0										GH
GSOR701421	IR64 x OrB	IR64_OrB_18	3	0.0013369	0.0153743	0.000668449										GH
GSOR701422	IR64 x OrB	IR64_OrB_19	4	0.000668449	0.0247326	0										GH
GSOR701423	IR64 x OrB	IR64_OrB_20	4	0	0.0481283	0.000668449										GH				Waxy
GSOR701424	IR64 x OrB	IR64_OrB_21	5	0	0.0247326	0.000668449			Bh4~							GH
GSOR701425	IR64 x OrB	IR64_OrB_22	2	0	0.032754	0.0013369										GH
GSOR701426	IR64 x OrB	IR64_OrB_23	4	0.00200535	0.0394385	0									100-200 seeds	GH
GSOR701427	IR64 x OrB	IR64_OrB_24	2	0	0.0200535	0										GH
GSOR701429	IR64 x OrB	IR64_OrB_25	6	0	0.0140374	0				Ehd1						GH
GSOR701430	IR64 x OrB	IR64_OrB_26	5	0	0.032754	0		SH4					shatters		~50 seeds	GH
GSOR701431	IR64 x OrB	IR64_OrB_27	2	0	0.0287433	0										GH
GSOR701721	IR64 x OrB	IR64_OrB_28	2	0.0013369	0.0127005	0.000668449										GH
GSOR701433	IR64 x OrB	IR64_OrB_29	4	0.0140374	0.0708556	0.0013369		OsSh1					shatters			GH		GS3
GSOR701434	IR64 x OrB	IR64_OrB_30	4	0.0187166	0.0608289	0		OsSh1								GH
GSOR701435	IR64 x OrB	IR64_OrB_31	4	0.00200535	0.0969251	0.000668449										GH
GSOR701437	IR64 x OrB	IR64_OrB_32	3	0.0013369	0.0360963	0.000668449										GH
GSOR701438	IR64 x OrB	IR64_OrB_33	5	0.00200535	0.0835561	0.000668449	Rd									GH
GSOR701722	IR64 x OrB	IR64_OrB_34	3	0.0026738	0.0775401	0.000668449			Bh4~			dark				GH
GSOR701723	IR64 x OrB	IR64_OrB_35	1	0	0.00935829	0			Bh4			dark			100-200 seeds	GH
GSOR701441	IR64 x OrB	IR64_OrB_36	2	0	0.0314171	0										GH				Waxy
GSOR701442	IR64 x OrB	IR64_OrB_37	3	0	0.0247326	0		SH4	Ph				shatters			GH
GSOR701443	IR64 x OrB	IR64_OrB_38	1	0	0.0127005	0										GH
GSOR701444	IR64 x OrB	IR64_OrB_39	3	0.0013369	0.0434492	0				RFT1; Hd3a						GH
GSOR701445	IR64 x OrB	IR64_OrB_40	6	0.000668449	0.0454545	0										GH
GSOR701724	IR64 x OrB	IR64_OrB_41	8	0.000668449	0.0287433	0.000668449										GH
GSOR701446	IR64 x OrB	IR64_OrB_42	4	0	0.0314171	0										GH
GSOR701447	IR64 x OrB	IR64_OrB_43	2	0	0.0113636	0										GH
GSOR701449	IR64 x OrB	IR64_OrB_44	6	0	0.0387701	0										GH
GSOR701450	IR64 x OrB	IR64_OrB_45	3	0	0.0227273	0										GH
GSOR701451	IR64 x OrB	IR64_OrB_46	2	0.000668449	0.0207219	0										GH				Waxy
GSOR701452	IR64 x OrB	IR64_OrB_47	3	0.0013369	0.0427807	0.000668449				RFT1; Hd3a						GH
GSOR701453	IR64 x OrB	IR64_OrB_48	4	0	0.0635027	0.000668449										GH
GSOR701455	IR64 x OrB	IR64_OrB_49	3	0.0013369	0.0300802	0.0013369										GH
GSOR701456	IR64 x OrB	IR64_OrB_50	4	0.000668449	0.0207219	0.000668449									100-200 seeds	GH
GSOR701458	IR64 x OrB	IR64_OrB_51	3	0	0.046123	0										GH
GSOR701459	IR64 x OrB	IR64_OrB_52	3	0	0.0307487	0.000668449										GH
GSOR701494	IR64 x OrB	IR64_OrB_53	5	0.00334225	0.0608289	0										GH	pi-ta
GSOR701463	IR64 x OrB	IR64_OrB_54	4	0	0.0381016	0.000668449	Rc			Ghd7	red				~50 seeds	GH
GSOR701462	IR64 x OrB	IR64_OrB_55	4	0	0.0487968	0										GH
GSOR701473	IR64 x OrB	IR64_OrB_56	2	0	0.0280749	0										GH
GSOR701465	IR64 x OrB	IR64_OrB_57	1	0	0.00467914	0.000668449										GH
GSOR701466	IR64 x OrB	IR64_OrB_58	2	0	0.0120321	0.000668449										GH
GSOR701468	IR64 x OrB	IR64_OrB_59	3	0	0.0334225	0		SH4					shatters			GH
GSOR701469	IR64 x OrB	IR64_OrB_60	1	0	0.0140374	0									100-200 seeds	GH
GSOR701725	IR64 x OrB	IR64_OrB_61	3	0.000668449	0.0233957	0.000668449										GH
GSOR701471	IR64 x OrB	IR64_OrB_62	1	0	0.0106952	0.000668449										GH
GSOR701472	IR64 x OrB	IR64_OrB_63	2	0.000668449	0.00868984	0										GH
GSOR701474	IR64 x OrB	IR64_OrB_64	2	0	0.0167112	0										GH
GSOR701475	IR64 x OrB	IR64_OrB_65	4	0.00334225	0.0421123	0										GH
GSOR701476	IR64 x OrB	IR64_OrB_66	5	0.0113636	0.0541444	0.000668449										GH
GSOR701477	IR64 x OrB	IR64_OrB_67	1	0.00200535	0.0227273	0.000668449										GH
GSOR701726	IR64 x OrB	IR64_OrB_68	3	0.0113636	0.0287433	0.000668449				Ehd1						GH
GSOR701482	IR64 x OrB	IR64_OrB_69	10	0.0213904	0.084893	0.000668449			Ph~	Ehd~						GH
GSOR701480	IR64 x OrB	IR64_OrB_70	1	0	0.00534759	0										GH
GSOR701727	IR64 x OrB	IR64_OrB_71	3	0.00200535	0.0173797	0										GH
GSOR701728	IR64 x OrB	IR64_OrB_72	1	0.00735294	0.0227273	0										GH
GSOR701484	IR64 x OrB	IR64_OrB_73	4	0	0.0274064	0										GH
GSOR701485	IR64 x OrB	IR64_OrB_74	3	0	0.026738	0.000668449										GH
GSOR701486	IR64 x OrB	IR64_OrB_75	4	0.0026738	0.0775401	0	Rd									GH
GSOR701488	IR64 x OrB	IR64_OrB_76	3	0	0.0280749	0										GH
GSOR701489	IR64 x OrB	IR64_OrB_77	6	0.0026738	0.0514706	0.000668449										GH			(ALK)
GSOR701490	IR64 x OrB	IR64_OrB_78	2	0	0.0213904	0										GH
GSOR701491	IR64 x OrB	IR64_OrB_79	2	0.000668449	0.0147059	0										GH
GSOR701492	IR64 x OrB	IR64_OrB_80	3	0.000668449	0.0220588	0.000668449										GH
GSOR701495	IR64 x OrB	IR64_OrB_81	4	0.00200535	0.0808824	0.000668449			Bh4~			dark				GH
GSOR701304	IR64 x OrC	IR64_OrC_1	6	0.0102696	0.0385109	0.0012837										GH
GSOR701305	IR64 x OrC	IR64_OrC_2	3	0	0.0410783	0										GH
GSOR701306	IR64 x OrC	IR64_OrC_3	3	0	0.0121951	0.000641849										GH
GSOR701307	IR64 x OrC	IR64_OrC_4	3	0	0.0802311	0										GH
GSOR701308	IR64 x OrC	IR64_OrC_5	3	0	0.0263158	0										GH
GSOR701309	IR64 x OrC	IR64_OrC_6	2	0	0.0109114	0	Rd									GH
GSOR701310	IR64 x OrC	IR64_OrC_7	5	0	0.0333761	0.0012837										GH
GSOR701311	IR64 x OrC	IR64_OrC_8	3	0	0.0263158	0		qSH1								GH
GSOR701312	IR64 x OrC	IR64_OrC_9	4	0	0.0231065	0										GH
GSOR701730	IR64 x OrC	IR64_OrC_10	6	0	0.0815148	0									<50 seeds	GH		(GS3)
GSOR701314	IR64 x OrC	IR64_OrC_11	2	0	0.0481386	0										GH
GSOR701315	IR64 x OrC	IR64_OrC_12	4	0	0.00898588	0.000641849										GH
GSOR701316	IR64 x OrC	IR64_OrC_13	8	0	0.0205392	0.0012837										GH
GSOR701731	IR64 x OrC	IR64_OrC_14	4	0	0.034018	0.000641849										GH
GSOR701338	IR64 x OrC	IR64_OrC_15	6	0.0365854	0.11104	0.0012837									100-200 seeds	GH
GSOR701335	IR64 x OrC	IR64_OrC_16	5	0.000641849	0.042362	0										GH
GSOR701346	IR64 x OrC	IR64_OrC_17	4	0.000641849	0.0622593	0.0012837										GH			(ALK~)
GSOR701336	IR64 x OrC	IR64_OrC_18	3	0.00192555	0.021181	0										GH
GSOR701732	IR64 x OrC	IR64_OrC_19	2	0.00192555	0.0237484	0.0012837										GH
GSOR701733	IR64 x OrC	IR64_OrC_20	6	0	0.0815148	0										GH		(GS3)
GSOR701734	IR64 x OrC	IR64_OrC_21	2	0	0.0462131	0		OsSh1								GH		(GS3)
GSOR701324	IR64 x OrC	IR64_OrC_22	9	0.0256739	0.0603338	0.00770218		OsSh1								GH
GSOR701326	IR64 x OrC	IR64_OrC_23	4	0	0.0474968	0				Ghd7						GH
GSOR701327	IR64 x OrC	IR64_OrC_24	3	0.00577664	0.0166881	0.0012837	Rd									GH
GSOR701328	IR64 x OrC	IR64_OrC_25	5	0.00256739	0.0840822	0.000641849		SH4					shatters			GH
GSOR701331	IR64 x OrC	IR64_OrC_26	2	0	0.00706033	0.000641849										GH
GSOR701332	IR64 x OrC	IR64_OrC_27	4	0	0.0353017	0										GH
GSOR701333	IR64 x OrC	IR64_OrC_28	2	0	0.0224647	0.000641849		SH4	Ph							GH
GSOR701337	IR64 x OrC	IR64_OrC_29	5	0.000641849	0.0860077	0	Rd									GH
GSOR701735	IR64 x OrC	IR64_OrC_30	1	0	0.0141207	0										GH
GSOR701736	IR64 x OrC	IR64_OrC_31	3	0.00385109	0.029525	0.00192555										GH
GSOR701737	IR64 x OrC	IR64_OrC_32	3	0.00256739	0.0436457	0.0012837										GH			(ALK)
GSOR701343	IR64 x OrC	IR64_OrC_33	2	0.000641849	0.00962773	0.000641849										GH
GSOR701344	IR64 x OrC	IR64_OrC_34	3	0	0.0288832	0				RFT1; Hd3a						GH				Waxy
GSOR701345	IR64 x OrC	IR64_OrC_35	2	0.0012837	0.0205392	0		SH4		RFT1; Hd3a			shatters			GH
GSOR701738	IR64 x OrC	IR64_OrC_36	3	0.00256739	0.0436457	0.00192555										GH			(ALK)
GSOR701739	IR64 x OrC	IR64_OrC_37	4	0	0.0629012	0		SH4~		Hd1			shatters		50-100 seeds	GH			(ALK~)
GSOR701351	IR64 x OrC	IR64_OrC_38	6	0.00770218	0.0539153	0.0012837										GH
GSOR701352	IR64 x OrC	IR64_OrC_39	4	0	0.0699615	0	Rc			Ghd7	red					GH
GSOR701353	IR64 x OrC	IR64_OrC_40	3	0.0012837	0.0275995	0										GH
GSOR701354	IR64 x OrC	IR64_OrC_41	3	0	0.0166881	0		OsSh1								GH
GSOR701355	IR64 x OrC	IR64_OrC_42	2	0	0.0192555	0.0012837										GH		(GS3)
GSOR701358	IR64 x OrC	IR64_OrC_43	7	0.00320924	0.0333761	0.0012837		OsSh1								GH
GSOR701359	IR64 x OrC	IR64_OrC_44	5	0.00770218	0.0455712	0.00192555										GH
GSOR701740	IR64 x OrC	IR64_OrC_45	3	0	0.0802311	0										GH
GSOR701361	IR64 x OrC	IR64_OrC_46	2	0.00192555	0.0166881	0										GH
GSOR701363	IR64 x OrC	IR64_OrC_47	5	0.000641849	0.0629012	0.0012837										GH			(ALK~)
GSOR701364	IR64 x OrC	IR64_OrC_48	3	0	0.0346598	0		SH4					shatters			GH
GSOR701741	IR64 x OrC	IR64_OrC_49	3	0	0.0397946	0										GH
GSOR701742	IR64 x OrC	IR64_OrC_50	4	0.00577664	0.0442875	0.000641849										GH
GSOR701743	IR64 x OrC	IR64_OrC_51	2	0	0.021181	0										GH
GSOR701368	IR64 x OrC	IR64_OrC_52	4	0	0.0519897	0.000641849	Rc			Ghd7; Ehd1	red					GH
GSOR701750	IR64 x OrC	IR64_OrC_53	2	0	0.0481386	0										GH
GSOR701371	IR64 x OrC	IR64_OrC_54	4	0	0.0346598	0				Ehd1						GH
GSOR701370	IR64 x OrC	IR64_OrC_55	4	0.000641849	0.0545571	0										GH
GSOR701372	IR64 x OrC	IR64_OrC_56	1	0	0.0205392	0				Ehd1~						GH
GSOR701373	IR64 x OrC	IR64_OrC_57	2	0	0.0179718	0										GH
GSOR701744	IR64 x OrC	IR64_OrC_58	2	0	0.0224647	0										GH
GSOR701745	IR64 x OrC	IR64_OrC_59	3	0	0.063543	0.0012837										GH	pi-ta
GSOR701746	IR64 x OrC	IR64_OrC_60	3	0	0.0513479	0.0012837		SH4							5 seeds	GH					Small, weak plant
GSOR701747	IR64 x OrC	IR64_OrC_61	3	0	0.0353017	0										GH
GSOR701378	IR64 x OrC	IR64_OrC_62	3	0.0237484	0.0539153	0.0012837										GH
GSOR701379	IR64 x OrC	IR64_OrC_63	3	0	0.0314506	0										GH
GSOR701380	IR64 x OrC	IR64_OrC_64	2	0	0.0179718	0.0012837										GH
GSOR701382	IR64 x OrC	IR64_OrC_65	7	0	0.0596919	0.00192555				Ehd1						GH
GSOR701383	IR64 x OrC	IR64_OrC_66	3	0	0.021181	0.0012837										GH
GSOR701748	IR64 x OrC	IR64_OrC_67	3	0	0.0494223	0										GH	pi-ta
GSOR701385	IR64 x OrC	IR64_OrC_68	5	0.000641849	0.110398	0.000641849										GH
GSOR701749	IR64 x OrC	IR64_OrC_69	4	0	0.0179718	0.000641849										GH
Footnotes
* donor introg = Lines carrying donor introgression across candidate gene(s) defined by flanking SNP alleles; "~" indicates one flanking SNP from the donor and one from the recurrent parent; "-het" indicates both flanking SNPs heterozygous
** "H-BB" = Heterozygous SNP on one side of target gene(s) and homozygous donor SNPs on other side.
*** Observations of low seed set are noted for lines with <200 seeds harvested from a single REFERENCE individual.
**** REF = Individual plant grown as a REFERENCE and used for both genotyping and source seed.
***** donor SNP = Lines carrying donor derived causal SNP in gene of interest; parentheses (donor SNP) = Lines where causal SNP info not available, so flanking SNPs used to indicate presence of donor allele.

## Sheet: Table_S3
Table S3. Summary of genomic regions in the CSSL libraries that are not represented by donor genome
Library	Total number introgressions not covered in the library	Chromosome	Start position (bp)	End position (bp)	Size of missing segment (bp)
CYBxOrA	49	1	192836	194844	2008
		1	1982467	1982774	307
		1	1999069	2014954	15885
		1	12641487	12733506	92019
		1	12920447	12928822	8375
		1	25966530	26187514	220984
		1	26339067	26374068	35001
		2	134511	312667	178156
		2	24048497	24272048	223551
		3	398385	588395	190010
		3	5872068	7166134	1294066
		3	28839060	29043940	204880
		3	29214672	29259896	45224
		3	32790808	33970114	1179306
		3	34484236	36340325	1856089
		4	8552	404869	396317
		4	28028583	29359467	1330884
		4	33186906	34935052	1748146
		5	64180	277001	212821
		5	1655402	2265814	610412
		5	3586486	3645628	59142
		5	4658470	4774887	116417
		5	5431060	5442792	11732
		6	204699	839462	634763
		6	3721346	3793246	71900
		6	3951547	3973507	21960
		6	8462994	11134664	2671670
		6	11172960	11637377	464417
		6	19598290	21645145	2046855
		7	29079097	29617554	538457
		8	182065	508097	326032
		8	14986111	15016954	30843
		8	20391635	20939712	548077
		8	27820599	28377609	557010
		9	251708	259933	8225
		9	13625463	14371341	745878
		9	22310234	22680525	370291
		10	13556772	14428360	871588
		10	20109243	20898297	789054
		10	22217647	23075197	857550
		11	2497290	3583526	1086236
		11	5589201	5709778	120577
		11	13465237	14070665	605428
		11	23129722	25703303	2573581
		11	29006738	29018362	11624
		12	4624422	5129581	505159
		12	10469146	10509878	40732
		12	18449327	18597553	148226
		12	27478228	27520623	42395
CYBxOrB	19	1	192836	194844	2008
		1	10021161	10348151	326990
		1	10348410	11063579	715169
		1	23584029	23717214	133185
		1	23731002	23897316	166314
		1	39799820	43104940	3305120
		1	43136187	43226422	90235
		2	134511	466851	332340
		3	398385	470708	72323
		4	8552	438075	429523
		4	34613382	34935052	321670
		5	2183329	2265814	82485
		5	2450078	2510367	60289
		5	2770834	2804222	33388
		5	3427089	3452362	25273
		5	3586486	3645628	59142
		6	11172960	11323202	150242
		6	12752685	12863097	110412
		6	12863154	13102364	239210
		7	29386450	29617554	231104
		8	182065	285604	103539
		8	24660024	24820448	160424
		8	28009053	28377609	368556
		9	251708	796434	544726
		9	1132419	1467951	335532
		9	1636524	1783458	146934
		9	6360984	6657192	296208
		10	71209	119514	48305
		11	236194	650148	413954
		11	28958989	29018362	59373
		12	20019351	20504797	485446
		12	24635654	24815205	179551
CYBxOrC	10	1	40455716	41917762	1462046
		1	43095535	43226422	130887
		2	134511	542635	408124
		3	398385	470708	72323
		3	12227282	13741450	1514168
		4	8552	267397	258845
		4	34613382	34935052	321670
		5	1655402	2183329	527927
		5	18834179	19928571	1094392
		5	29584298	29842345	258047
		6	28705989	31209346	2503357
		7	19822554	20053614	231060
		7	29288097	29617554	329457
		8	182065	285604	103539
		8	28009053	28377609	368556
		9	251708	259933	8225
		9	22408017	22680525	272508
		10	71209	119514	48305
		10	929697	2825277	1895580
		11	21032445	21249292	216847
		11	23033949	23080452	46503
		11	28974408	29018362	43954
		12	20019351	20790034	770683
		12	21764099	21765073	974
IR64xOrA	6	1	192836	195334	2498
		2	35691841	35797762	105921
		3	398385	470708	72323
		3	35878972	36340325	461353
		4	12954360	21271163	8316803
		4	21864875	28762615	6897740
		5	29584298	29842345	258047
		6	31064830	31209346	144516
		7	45820	284536	238716
		7	4587886	5003396	415510
		8	182065	857056	674991
		8	9289473	17516403	8226930
		8	28058830	28377609	318779
		9	251708	259933	8225
		11	236194	681662	445468
		12	18764104	20085496	1321392
		12	25016047	25490919	474872
IR64xOrB	20	1	192836	195334	2498
		1	10846090	12733506	1887416
		1	23656773	24115700	458927
		1	42819331	43226422	407091
		2	35081420	35797762	716342
		3	398385	851785	453400
		3	853802	1270943	417141
		3	3313047	4759086	1446039
		3	15298374	15709424	411050
		3	35737093	36340325	603232
		4	8552	204306	195754
		5	64180	255323	191143
		5	17017106	17225904	208798
		5	20331215	20688224	357009
		5	29100308	29842345	742037
		6	204699	346639	141940
		6	5995006	6301048	306042
		6	9149775	11618178	2468403
		6	30822552	31209346	386794
		7	45820	284536	238716
		7	3973986	5003396	1029410
		7	15854586	23992987	8138401
		7	28851245	29617554	766309
		8	250632	857056	606424
		8	8897653	18185078	9287425
		8	22394133	23434376	1040243
		8	28058830	28377609	318779
		9	251708	496013	244305
		9	6796269	7116276	320007
		9	12915373	13552477	637104
		9	15752720	16532043	779323
		9	22400644	22680525	279881
		10	71209	146531	75322
		10	9968948	15128247	5159299
		10	23033344	23075197	41853
		11	4289151	4826905	537754
		11	28974408	29018362	43954
		12	24051903	25332488	1280585
		12	27023424	27520623	497199
IR64xOrC	19	1	192836	315225	122389
		1	8269522	10100605	1831083
		1	24893163	25139879	246716
		1	38258929	43226422	4967493
		2	3830219	4682879	852660
		2	9975660	12355019	2379359
		2	19456018	20119732	663714
		2	21854908	22334916	480008
		2	31550710	32323814	773104
		2	35401891	35797762	395871
		3	398385	851785	453400
		3	29527021	31018646	1491625
		3	35828296	36340325	512029
		4	8552	247628	239076
		4	264061	4361741	4097680
		4	14482427	23294656	8812229
		4	34537111	34697191	160080
		5	64180	255323	191143
		5	313688	2291156	1977468
		5	4130216	6833061	2702845
		5	18405433	18679404	273971
		5	29100308	29842345	742037
		6	204699	373630	168931
		6	31064830	31209346	144516
		7	45820	310983	265163
		7	3686042	5003396	1317354
		7	23087994	24507157	1419163
		7	29386450	29617554	231104
		8	28058830	28377609	318779
		9	251708	259933	8225
		9	22400644	22680525	279881
		10	71209	146531	75322
		10	851802	1430027	578225
		10	23033344	23075197	41853
		11	236194	256688	20494
		11	3244411	5589201	2344790
		11	28753455	29018362	264907
		12	17902839	19511737	1608898
		12	27478228	27520623	42395
Red text = Start position indicates position of first SNP on the chip and End position indicates position of first informative SNP in a given population, only if different.
Purple text = End position indicates position of last SNP on the chip and End position indicates position of last informative SNP in a given population, only if different.
